# Supplementary material for: Polaron transport in hybrid CH3NH3PbI3 perovskite thin films
Source: Royal Society of Chemistry journal article supplement (doi:10.1039/d0nr03432k), 2020-01-01
Supplement: d0nr03432k1.pdf [file d0nr03432k1.pdf]

## Supplementary information to:

### Polaron Transport in Hybrid CH<sub>3</sub>NH<sub>3</sub>PbI<sub>3</sub> Perovskite thin films

Anusit Thongnum<sup>1,3,\*</sup> and Udomsilp Pinsook<sup>2,3</sup>

<sup>1</sup>Department of Physics, Faculty of Science, Srinakharinwirot University, Bangkok, 10110 Thailand

<sup>2</sup>Department of Physics, Faculty of Science, Chulalongkorn University, Bangkok, 10300 Thailand

<sup>3</sup>Thailand Center of Excellence in Physics, Commission on Higher Education, Bangkok 10400 Thailand

\**anusit@swu.ac.th* and *anusit@g.swu.ac.th*

In order to investigate transport mechanisms in a prototypical CH<sub>3</sub>NH<sub>3</sub>PbI<sub>3</sub> thin film, we considered the charge-carrier scattering due to lattice defects and LO phonon. In numerical calculations, we used the constant parameters in Table S1 to fit carrier mobility data measured by TRTS techniques (sum of both electron and hole mobilities) for the MAPbI<sub>3</sub> thin film [1]. The first process is an ionized impurity (II) scattering. The MA interstitials ( $I_{MA}$ ) and Pb vacancies ( $V_{Pb}$ ) [2,3], were monitored as the scattering center. A standard approach [4], Brooks-Herring formula, was used to describe the scattering of ionized impurities as:

$$\mu_{II} = \frac{128\sqrt{2\pi}(\epsilon_0\epsilon_s)^2(k_B T)^{3/2}}{\sqrt{m^*} Z^2 e^3 N_I [\ln(1 + \beta) - \beta/(1 + \beta)]}, \quad (S1)$$

where  $\beta = 24\epsilon_0\epsilon_s m^* (k_B T)^2 / \hbar^2 e^2 n$ ,  $n$  is the density of charge-carrier,  $N_I$  is the density of an ionized impurity, and  $Z$  is the ionic charge of an ionized impurity. The second process is polaron-LO phonon scattering. The LP polaron mobility formula, Eq. (2) in the main text, was adopted to calculate the mobility.

In order to predict charge-carrier mobility in the orthorhombic phase, the effective masses of the electron and hole as well as dielectric functions related the structural phase transition in Table S1,

were applied in the calculations. We used Matthiessen's rule based on  $\mu_{tot}^{-1} = \sum_i \mu_i^{-1}$  to determine the total charge-carrier mobility. This rule assumes that various scatterings operate independently of each other. If one scattering mechanism dominates, other scatterings can be ignored. Figure S1 shows the fitted mobilities and experimental data [1] in the orthorhombic phase. The total charge-carrier mobility,  $\mu_{tot}^{-1} = \mu_{II(I_{MA})}^{-1} + \mu_{II(V_{Pb})}^{-1} + \mu_{LO}^{-1}$ , was in very good agreement with the experimental data over the whole temperature range. The fitting result suggested that the scattering from ionized impurities is predominant at  $T < 80$  K.

**Table S1.** The constant parameters used in the calculation

| Parameter                           | Symbol (units)                      | Value                              |
|-------------------------------------|-------------------------------------|------------------------------------|
| <b>MAPbI<sub>3</sub> perovskite</b> |                                     |                                    |
| Effective masses                    | $m_e^*$ (kg)                        | $0.23m_0$ [5] (orthorhombic phase) |
|                                     | $m_h^*$ (kg)                        | $0.39m_0$ [5] (orthorhombic phase) |
| LO phonon energy                    | $\hbar\omega_{LO}$ (meV)            | 11.5 [6]                           |
| Charge-carrier densities            | $n = n_e = n_h$ (cm <sup>-2</sup> ) | $5 \times 10^{14}$                 |
| Density of MA interstitial          | $N_{I_{MA}}$ (cm <sup>-3</sup> )    | $2 \times 10^{16}$                 |
| Density of Pb vacancy               | $N_{V_{Pb}}$ (cm <sup>-3</sup> )    | $2 \times 10^{16}$                 |
| Ionic charge of MA interstitial     | $Z$                                 | +1.0                               |
| Ionic charge of Pb vacancy          | $Z$                                 | +2.0                               |

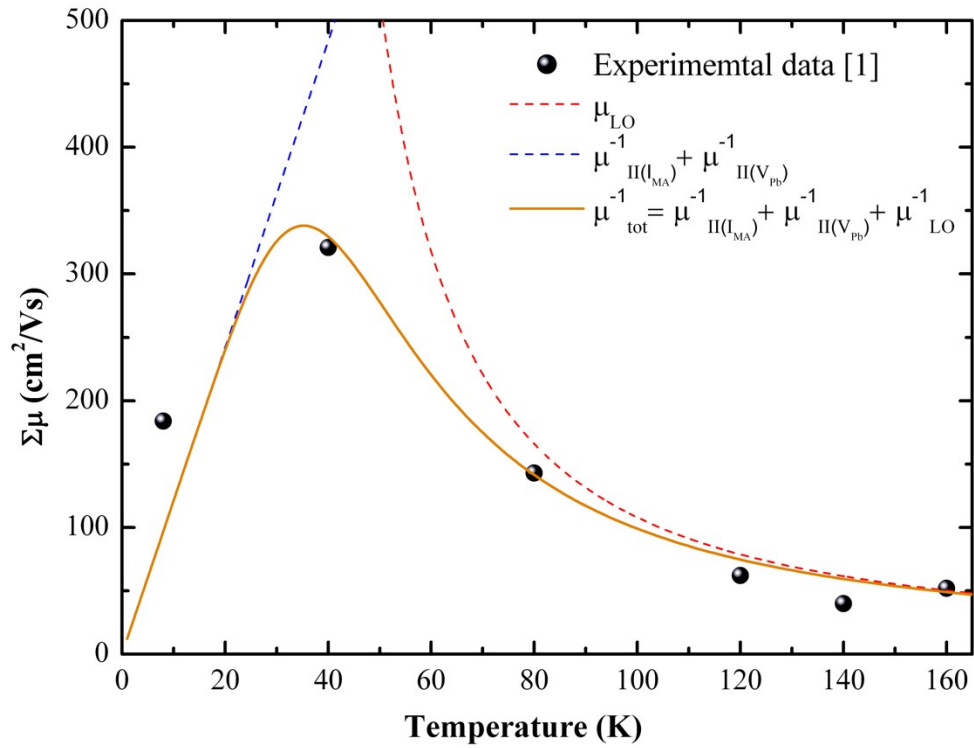

**Figure S1:** Temperature dependence of the fitted mobilities and the experimental results [1]. The dashed lines represent the individual scattering limited mobilities. The solid line represents the total mobility.

### Supplementary references

- [1] R. L. Milot, G. E. Eperon, H. J. Snaith, M. B. Johnston and L. M. Herz, *Adv. Func. Mater.* 2015, **25**, 6218.
- [2] W.-J. Yin, T. Shi, and Y. Yan, *Appl. Phys. Lett.*, 2014, **104**, 63903.
- [3] J. M. Ball and A. Petrozza, *Nature Energy*, 2016, **149**, 1.
- [4] D. Chattopadhyay and H. J. Queisser, *Rev. Mod. Phys.* 1981, **53**, 745.
- [5] W. Geng, L. Zhang, Y. -N. Zhang, W. -M. Lau and L. -M. Liu, *J. Phys. Chem. C*, 2014, **118**, 19565.
- [6] A. D. Wright, C. Verdi, R. L. Milot, G. Eperon, M. A. Perez-Osorio, H. J. Snaith, F. Giustino, M. B. Johnston and L. M. Herz, *Nat. Commun.* 2016, **7**, 11755.
